# Supplementary material for: Advancing the understanding of mainstream shortcut nitrogen removal: resource efficiency, carbon redirection, and plant capacity
Source: Royal Society of Chemistry journal article supplement (doi:10.1039/d2ew00247g), 2022-01-01
Supplement: d2ew00247g1.pdf [file d2ew00247g1.pdf]

## SUPPLEMENTAL INFORMATION

Table of stoichiometric values used in mass balance calculations. These values are taken from the open source SUMO2 two-step nitrification model.

| Parameter                    | Symbol       | Value | Units                                                                 |
|------------------------------|--------------|-------|-----------------------------------------------------------------------|
| Heterotrophic Yield, Aerobic | $Y_{OHO}$    | 0.67  | $\frac{\text{g } X_{OHO} - \text{COD}}{\text{g } S_B - \text{COD}}$   |
| Heterotrophic Yield, Anoxic  | $Y_{OHO,Ax}$ | 0.54  | $\frac{\text{g } X_{OHO} - \text{COD}}{\text{g } S_B - \text{COD}}$   |
| AOB Yield                    | $Y_{AOB}$    | 0.15  | $\frac{\text{g } X_{AOB} - \text{COD}}{\text{g } S_{NHx} - \text{N}}$ |
| NOB Yield                    | $Y_{NOB}$    | 0.09  | $\frac{\text{g } X_{NOB} - \text{COD}}{\text{g } S_{NO2} - \text{N}}$ |
| Nitrogen content of Biomass  | $i_{N,B}$    | 0.07  | $\frac{\text{g N}}{\text{g COD}}$                                     |

Process factor derivation for anammox (PNA and PdNA) processes. Calculations are shown using  $NO_x$  which is assumed to be all  $NO_2$  for PNA or  $NO_3$  for PdNA.

The effluent TIN of the first 2 steps of the process (nitrification and denitrification with influent COD) is:

$$TIN = NH_x + NO_x = 1 - TIN_{RO} \quad (1)$$

By definition:

$$AVN = \frac{NH_x}{NO_x} \quad (2)$$

$$NH_x = AVN \cdot NO_x \quad (3)$$

Combining (1) and (3):

$$NO_x + AVN \cdot NO_x = 1 - TIN_{RO}$$

$$NO_x(1 + AVN) = 1 - TIN_{RO}$$

Rearranging, the  $NO_x$  to be removed via partial denitrification an/or anammox is then:

$$NO_x = \frac{1 - TIN_{RO}}{1 + AVN}$$

The  $NO_3$  produced by anammox that needs to be denitrified is a stoichiometric ratio of this, ie:

$$\frac{1 - TIN_{RO}}{1 + AvN} v_{5,5}$$

Finally, the amount of  $NH_x$  that must be undergo nitritation or nitrification, is equivalent to the effluent TIN plus the TIN removed with influent COD ( $TIN_{RO}$ ), or:

$$\frac{1 - TIN_{RO}}{1 + AvN} + TIN_{RO}$$
